# Supplementary material for: Antifungal Substances Produced by Xenorhabdus bovienii and Its Inhibition Mechanism against Fusarium solani
Source: MDPI journal article supplement (doi:10.3390/ijms23169040), 2022-08-12
Supplement: s1 [file s1]

## Supplementary Materials

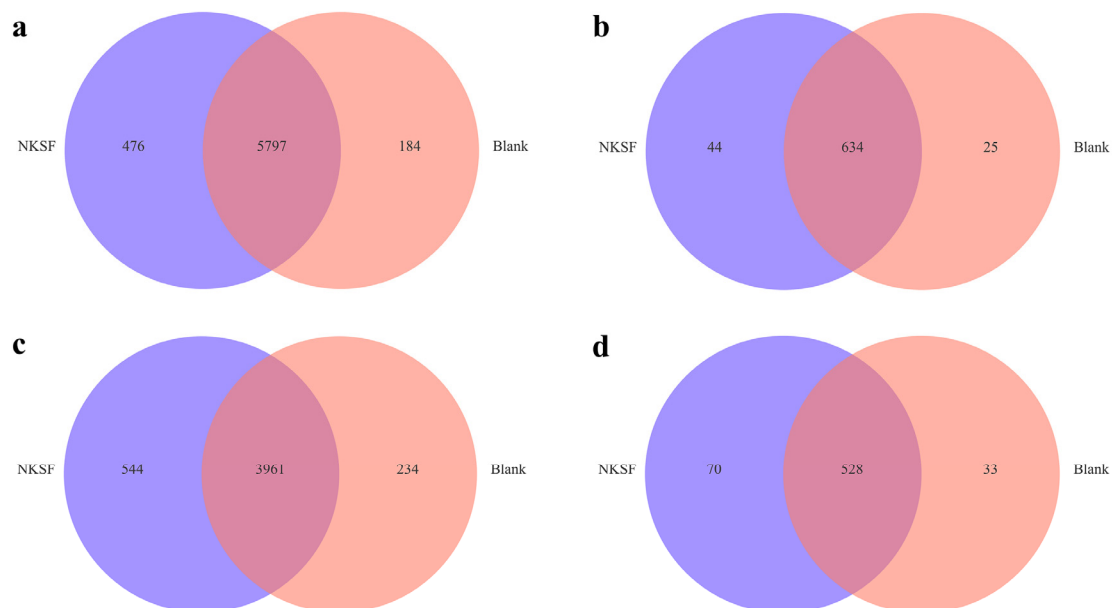

**Figure S1.** Venn analysis. (a) cationic metabolites; (b) named cationic metabolites; (c) anionic metabolites; (d) named anionic metabolites

**Table S1.** Number of differential expression genes in KEGG pathway.

| KEGG ID  | Description                       | Count | Up | Down |
|----------|-----------------------------------|-------|----|------|
| fgr03010 | Ribosome                          | 83    | 82 | 1    |
| fgr03008 | Ribosome biogenesis in eukaryotes | 48    | 43 | 5    |
| fgr00190 | Oxidative phosphorylation         | 46    | 36 | 10   |
| fgr04111 | Cell cycle - yeast                | 41    | 7  | 34   |
| fgr04113 | Meiosis - yeast                   | 31    | 3  | 28   |
| fgr03030 | DNA replication                   | 16    | 0  | 16   |
| fgr04138 | Autophagy - yeast                 | 38    | 14 | 24   |
